# Supplementary material for: Management of Helicobacter pylori infection: the Maastricht VI/Florence consensus report
Source: HighWire-hosted journal article supplement (doi:10.1136/gutjnl-2022-327745), 2022-08-08
Supplement: gutjnl-2022-327745supp002_data_supplement.pdf [file gutjnl-2022-327745supp002_data_supplement.pdf]

| Susceptibility-guided treatment                                                                                                                                                                                                                                                                                                                                                                                                                                                                                                                                                                                                                                                                                                                                                                                                                                                                                                                                                                                                                                                                                                                                                                                                                                                                                                                                                                                                                                                                                                                                                                                     | Empirical treatment                                                                                                                                                                                                                                                                                                                                                                                                                                                                                                                                                                                                                                                                                                                                                                                                                                                                                                                                                                                                                                                                                                                                                                                                                                                                                                                                                                                                                                                                                                                                                                                                                                                                                                                                                                                       |
|---------------------------------------------------------------------------------------------------------------------------------------------------------------------------------------------------------------------------------------------------------------------------------------------------------------------------------------------------------------------------------------------------------------------------------------------------------------------------------------------------------------------------------------------------------------------------------------------------------------------------------------------------------------------------------------------------------------------------------------------------------------------------------------------------------------------------------------------------------------------------------------------------------------------------------------------------------------------------------------------------------------------------------------------------------------------------------------------------------------------------------------------------------------------------------------------------------------------------------------------------------------------------------------------------------------------------------------------------------------------------------------------------------------------------------------------------------------------------------------------------------------------------------------------------------------------------------------------------------------------|-----------------------------------------------------------------------------------------------------------------------------------------------------------------------------------------------------------------------------------------------------------------------------------------------------------------------------------------------------------------------------------------------------------------------------------------------------------------------------------------------------------------------------------------------------------------------------------------------------------------------------------------------------------------------------------------------------------------------------------------------------------------------------------------------------------------------------------------------------------------------------------------------------------------------------------------------------------------------------------------------------------------------------------------------------------------------------------------------------------------------------------------------------------------------------------------------------------------------------------------------------------------------------------------------------------------------------------------------------------------------------------------------------------------------------------------------------------------------------------------------------------------------------------------------------------------------------------------------------------------------------------------------------------------------------------------------------------------------------------------------------------------------------------------------------------|
| <p><b>Advantages:</b></p> <ul style="list-style-type: none"> <li>• Provide personalized treatment</li> <li>• Reduce unnecessary antibiotic prescription</li> <li>• Limit the emergence of antibiotic resistance worldwide</li> <li>• Allow performing resistance surveys over time</li> <li>• Might allow prescribing the optimized clarithromycin-based triple therapy to patients with clarithromycin-susceptible strains in areas with high overall clarithromycin resistance</li> <li>• Molecular testing on gastric biopsies is a highly accurate diagnostic method.</li> </ul> <p><b>Limitations:</b></p> <p>While molecular tests based on gastric biopsies benefit from a long experience, it is not the same with stool samples. However novel commercial molecular kits have recently become available.</p> <ul style="list-style-type: none"> <li>• An endoscopy is required to obtain gastric biopsies which is expensive and uncomfortable</li> <li>• Low rate of acceptance of endoscopy by patients</li> <li>• Since most endoscopy findings are normal this procedure does not contribute to management in young patients (age below 50 years)</li> <li>• Culture is time-consuming and requires expertise</li> <li>• Culture is not always available on a routine basis</li> <li>• Culture provides information for all antibiotics but it is useful only for clarithromycin and quinolones</li> <li>• Metronidazole testing is not reproducible and has an imperfect correlation between <i>in vitro</i> and <i>in vivo</i> results</li> <li>• Expensive (mainly because of endoscopy)</li> </ul> | <p><b>Advantages:</b></p> <ul style="list-style-type: none"> <li>• “Test-and-treat” strategy for dyspepsia is recommended by all consensus conferences (for young patients without alarm symptoms)</li> <li>• Resistance to amoxicillin , tetracycline and rifabutin is extremely rare, so they can be empirically prescribed</li> <li>• No <i>in vitro</i> resistance to bismuth has been described, so it can be also empirically prescribed</li> <li>• <i>in vitro</i> metronidazole resistance has a limited impact on the efficacy of treatments when sufficiently long treatments and high metronidazole doses are used</li> <li>• The position in the case of failure is clear: not to re-administer any of the antibiotics against which <i>H. pylori</i> has probably become resistant</li> <li>• Rifabutin and furazolidone are good alternatives for empirical treatment after several eradication failures</li> <li>• Cumulative <i>H. pylori</i> eradication rate with several successive rescue therapies empirically prescribed reaches almost 100%</li> </ul> <p><b>Limitations:</b></p> <ul style="list-style-type: none"> <li>• Resistance of <i>H. pylori</i> to antibiotics has reached alarming levels worldwide</li> <li>• Empirical treatment may increase the emergence of antibiotic resistance worldwide</li> <li>• In some cases, it will imply prescribing an antibiotic that will lack efficacy</li> <li>• Increase unnecessary antibiotic prescription</li> <li>• Does not allow performing resistance surveys</li> <li>• Does not provide personalized treatment</li> <li>• May induce transient increase of antibiotic resistance to certain other bacteria</li> <li>• May induce short-term perturbation of gut microbiota after <i>H. pylori</i> eradication</li> </ul> |
