# Supplementary material for: Management of Helicobacter pylori infection: the Maastricht VI/Florence consensus report
Source: HighWire-hosted journal article supplement (doi:10.1136/gutjnl-2022-327745), 2022-08-08
Supplement: gutjnl-2022-327745supp003_data_supplement.pdf [file gutjnl-2022-327745supp003_data_supplement.pdf]

| Author        | Year | Country | Treatment order | Duration (days) | Eradication n/N (intention-to-treat, %) |
|---------------|------|---------|-----------------|-----------------|-----------------------------------------|
| Bago [257]    | 2007 | Croatia | First           | 7               | 57/66 (86%)                             |
| Cao [258]     | 2015 | China   | First           | 14              | 117/141 (83%)                           |
| Fu [259]      | 2017 | China   | First           | 14              | 167/200 (84%)                           |
| Gan (a) [260] | 2018 | China   | First           | 14              | 155/200 (78%)                           |
| Gan (b) [260] | 2018 | China   | First           | 14              | 155/187 (83%)                           |
| Gao [261]     | 2010 | China   | First           | 10              | 60/72 (83%)                             |
| Gisbert [253] | 2015 | Spain   | Second          | 14              | 180/200 (90%)                           |
| Hsu [262]     | 2008 | Taiwan  | Third           | 10              | 31/37 (84%)                             |
| Aksoy [263]   | 2017 | Turkey  | First           | 14              | 93/111 (84%)                            |
| Liao [264]    | 2013 | China   | First           | 14              | 70/80 (88%)                             |
| Song [265]    | 2016 | China   | Second          | 14              | 97/132 (74%)                            |
| Yee [266]     | 2007 | China   | ≥ Second        | 7               | 37/51 (73%)                             |

Gan (a): levofloxacin 500 mg/24h; Gan (b): levofloxacin 200 mg/12h.
