# Supplementary material for: Management of Helicobacter pylori infection: the Maastricht VI/Florence consensus report
Source: HighWire-hosted journal article supplement (doi:10.1136/gutjnl-2022-327745), 2022-08-08
Supplement: gutjnl-2022-327745supp004_data_supplement.pdf [file gutjnl-2022-327745supp004_data_supplement.pdf]

| <b>Author and Reference</b>    | <b>Year of publication</b> | <b>Number of patients</b> | <b>Previous (failed) treatments</b>                               | <b>Duration (days)</b> | <b>Eradication (%)</b> |
|--------------------------------|----------------------------|---------------------------|-------------------------------------------------------------------|------------------------|------------------------|
| <i>Gatta et al. [275]</i>      | 2005                       | 151                       | 1 <sup>st</sup> : PPI+C+A or M<br>2 <sup>nd</sup> : PPI+C+A or M; | 7-14                   | 76                     |
| <i>Gisbert et al [276]</i>     | 2006                       | 100                       | 1 <sup>st</sup> : PPI+C+A<br>2 <sup>nd</sup> : Q                  | 10                     | 60                     |
| <i>Gisbert et al [277]</i>     | 2006                       | 20                        | 1 <sup>st</sup> : PPI+C+A<br>2 <sup>nd</sup> : Q                  | 10                     | 85                     |
| <i>Hsu et al [262]</i>         | 2008                       | 37                        | 1 <sup>st</sup> : PPI+C+A<br>2 <sup>nd</sup> : Q                  | 10                     | 84                     |
| <i>Rokkas et al [278]</i>      | 2009                       | 30                        | 1 <sup>st</sup> : PPI+C+A<br>2 <sup>nd</sup> : Q                  | 10                     | 70                     |
| <i>Gisbert et al [279]</i>     | 2012                       | 200                       | 1 <sup>st</sup> : PPI+C+A<br>2 <sup>nd</sup> : Q                  | 10                     | 68                     |
| <i>Burgos-Santamaría [280]</i> | 2019                       | 65                        | 1 <sup>st</sup> : PPI+C+A<br>2 <sup>nd</sup> : Q                  | 7-14                   | 75                     |
| <i>Burgos-Santamaría [280]</i> | 2019                       | 19                        | 1 <sup>st</sup> : PPI+C+A<br>2 <sup>nd</sup> : Q                  | 14                     | 84                     |
| <i>Burgos-Santamaría [281]</i> | 2021                       | 39                        | 1 <sup>st</sup> : PPI+C+A±M<br>2 <sup>nd</sup> : Q                | 10-14                  | 74                     |
| <i>Burgos-Santamaría [281]</i> | 2021                       | 28                        | 1 <sup>st</sup> : PPI+C+A±M<br>2 <sup>nd</sup> : Q                | 14                     | 75                     |

PPI: proton pump inhibitor; C: clarithromycin; M: metronidazole; A: amoxicillin; Q: bismuth-containing quadruple therapy (PPI, bismuth, tetracycline and M).

<sup>†</sup>Bismuth was added to the triple regimen with a proton pump inhibitor, amoxicillin, and levofloxacin.
