# Supplementary material for: Management of Helicobacter pylori infection: the Maastricht VI/Florence consensus report
Source: HighWire-hosted journal article supplement (doi:10.1136/gutjnl-2022-327745), 2022-08-08
Supplement: gutjnl-2022-327745supp005_data_supplement.pdf [file gutjnl-2022-327745supp005_data_supplement.pdf]

|                                                                                                                                                                                                                                                                                                                                                                                                                                                                                                                                                                                                                                                                                                                                                                                                                                                                                                                                                                                                                                                                                                                                                                                                                                                                                                                                                                                                                                                       |
|-------------------------------------------------------------------------------------------------------------------------------------------------------------------------------------------------------------------------------------------------------------------------------------------------------------------------------------------------------------------------------------------------------------------------------------------------------------------------------------------------------------------------------------------------------------------------------------------------------------------------------------------------------------------------------------------------------------------------------------------------------------------------------------------------------------------------------------------------------------------------------------------------------------------------------------------------------------------------------------------------------------------------------------------------------------------------------------------------------------------------------------------------------------------------------------------------------------------------------------------------------------------------------------------------------------------------------------------------------------------------------------------------------------------------------------------------------|
| <b>METABOLISM</b>                                                                                                                                                                                                                                                                                                                                                                                                                                                                                                                                                                                                                                                                                                                                                                                                                                                                                                                                                                                                                                                                                                                                                                                                                                                                                                                                                                                                                                     |
| <ul style="list-style-type: none"> <li>• <b>Metabolic syndrome and diabetes mellitus (DM)</b></li> </ul> <p><i>For:</i> Chen <i>et al.</i> [524], Yang <i>et al.</i> [525]<br/> <i>Against:</i> Naja <i>et al.</i> [526], Wada <i>et al.</i> [527]</p>                                                                                                                                                                                                                                                                                                                                                                                                                                                                                                                                                                                                                                                                                                                                                                                                                                                                                                                                                                                                                                                                                                                                                                                                |
| <b>LIVER DISEASE</b>                                                                                                                                                                                                                                                                                                                                                                                                                                                                                                                                                                                                                                                                                                                                                                                                                                                                                                                                                                                                                                                                                                                                                                                                                                                                                                                                                                                                                                  |
| <ul style="list-style-type: none"> <li>• <b>Non-alcoholic fatty liver disease (NAFLD)</b></li> </ul> <p><i>For:</i> Kim <i>et al.</i> [528], Ning <i>et al.</i> [529]<br/> <i>Against:</i> Okushin <i>et al.</i> [530]</p>                                                                                                                                                                                                                                                                                                                                                                                                                                                                                                                                                                                                                                                                                                                                                                                                                                                                                                                                                                                                                                                                                                                                                                                                                            |
| <b>CARDIOVASCULAR DISEASES</b>                                                                                                                                                                                                                                                                                                                                                                                                                                                                                                                                                                                                                                                                                                                                                                                                                                                                                                                                                                                                                                                                                                                                                                                                                                                                                                                                                                                                                        |
| <ul style="list-style-type: none"> <li>• <b>Coronary artery disease (CAD)</b></li> </ul> <p><i>For:</i> Yu <i>et al.</i> [531].<br/> <i>Against:</i> Schottker <i>et al.</i> [532]</p>                                                                                                                                                                                                                                                                                                                                                                                                                                                                                                                                                                                                                                                                                                                                                                                                                                                                                                                                                                                                                                                                                                                                                                                                                                                                |
| <b>NEUROLOGIC DISEASES</b>                                                                                                                                                                                                                                                                                                                                                                                                                                                                                                                                                                                                                                                                                                                                                                                                                                                                                                                                                                                                                                                                                                                                                                                                                                                                                                                                                                                                                            |
| <ul style="list-style-type: none"> <li>• <b>Stroke</b></li> </ul> <p><i>For:</i> Wang <i>et al.</i> [533], Alvarez-Arellano <i>et al.</i> [534]<br/> <i>Against:</i> Chen <i>et al.</i> [535]</p> <ul style="list-style-type: none"> <li>• <b>Alzheimer's disease</b></li> </ul> <p><i>For:</i> Huang <i>et al.</i> [536], Roubaud Baudron <i>et al.</i> [537], Beydoun <i>et al.</i> [538], Kountouras <i>et al.</i> [539], Kountouras <i>et al.</i> [540], Kountouras <i>et al.</i> [541], Santos <i>et al.</i> [542], Kountouras <i>et al.</i> [543], Zelaya <i>et al.</i> [544], Attems J <i>et al.</i> [545], Thomann <i>et al.</i> [546], Forster <i>et al.</i> [547], Chang <i>et al.</i> [548]<br/> <i>Against:</i> Shiota <i>et al.</i> [549]</p> <ul style="list-style-type: none"> <li>• <b>Multiple sclerosis</b></li> </ul> <p><i>Against:</i> Mohebi <i>et al.</i> [550], Cook <i>et al.</i> [551]</p> <ul style="list-style-type: none"> <li>• <b>Parkinson's disease</b></li> </ul> <p><i>For:</i> Shen X <i>et al.</i> [552], Huang HK <i>et al.</i> [553], Fasano <i>et al.</i> [554], Tan <i>et al.</i> [555], Mridula <i>et al.</i> [556], Candelario-Jalil <i>et al.</i> [557], Lo <i>et al.</i> [558], Dobbs <i>et al.</i> [559]</p> <ul style="list-style-type: none"> <li>• <b>Guillain-Barré syndrome</b></li> </ul> <p><i>For:</i> Kountouras <i>et al.</i> [560], Moran <i>et al.</i> [561], Chiba <i>et al.</i> [562]</p> |
| <b>DERMATOLOGICAL DISEASES</b>                                                                                                                                                                                                                                                                                                                                                                                                                                                                                                                                                                                                                                                                                                                                                                                                                                                                                                                                                                                                                                                                                                                                                                                                                                                                                                                                                                                                                        |
| <ul style="list-style-type: none"> <li>• <b>Rosacea</b></li> </ul> <p><i>For:</i> Gravina <i>et al.</i> [563], Argenziano <i>et al.</i> [564], El-Khalawany <i>et al.</i> [565]</p> <ul style="list-style-type: none"> <li>• <b>Psoriasis</b></li> </ul> <p><i>For:</i> Qayoom <i>et al.</i> [566], Mesquita <i>et al.</i> [567], Ribaldone <i>et al.</i> [568], Onsun <i>et al.</i> [569]<br/> <i>Against:</i> Campanati <i>et al.</i> [570], Azizzadeh <i>et al.</i> [571]</p> <ul style="list-style-type: none"> <li>• <b>Chronic urticaria</b></li> </ul> <p><i>For:</i> Hizal <i>et al.</i> [572], Galadari <i>et al.</i> [573], Yoshimasu <i>et al.</i> [574]<br/> <i>Against:</i> Campanati <i>et al.</i> [575]</p> <ul style="list-style-type: none"> <li>• <b>Alopecia areata</b></li> </ul> <p><i>For:</i> Behrangi <i>et al.</i> [576]<br/> <i>Against:</i> Rigopoulos <i>et al.</i> [577]</p> <ul style="list-style-type: none"> <li>• <b>Autoimmune bullous diseases</b></li> </ul> <p><i>For:</i> Sagi <i>et al.</i> [578], Mortazavi <i>et al.</i> [579]</p> <ul style="list-style-type: none"> <li>• <b>Schöenlein-Henoch purpura</b></li> </ul> <p><i>For:</i> Novák <i>et al.</i> [580], Grivceva-Panovska <i>et al.</i> [581], Hoshino <i>et al.</i> [582]</p>                                                                                                                                                                     |
| <b>OCULAR DISEASES</b>                                                                                                                                                                                                                                                                                                                                                                                                                                                                                                                                                                                                                                                                                                                                                                                                                                                                                                                                                                                                                                                                                                                                                                                                                                                                                                                                                                                                                                |
| <ul style="list-style-type: none"> <li>• <b>Open-angle glaucoma</b></li> </ul> <p><i>For:</i> Zeng J <i>et al.</i> [583], Testerman <i>et al.</i> [77]<br/> <i>Against:</i> Galloway <i>et al.</i> [584], Kurtz <i>et al.</i> [585]</p> <ul style="list-style-type: none"> <li>• <b>Central serous chorioretinitis</b></li> </ul> <p><i>For:</i> Casella <i>et al.</i> [586], Liu <i>et al.</i> [587], Cotticelli <i>et al.</i> [588], Rahbani-Nobar <i>et al.</i> [589], Dang <i>et al.</i> [590]<br/> Zavoloka <i>et al.</i> [591]</p> <ul style="list-style-type: none"> <li>• <b>Blepharitis</b></li> </ul> <p><i>For:</i> Saccà <i>et al.</i> [592]<br/> <i>Against:</i> Saccà <i>et al.</i> [593]</p>                                                                                                                                                                                                                                                                                                                                                                                                                                                                                                                                                                                                                                                                                                                                           |
