# Supplementary figures and images for: Management of Helicobacter pylori infection: the Maastricht VI/Florence consensus report
Source: HighWire-hosted journal article supplement (doi:10.1136/gutjnl-2022-327745), 2022-08-08

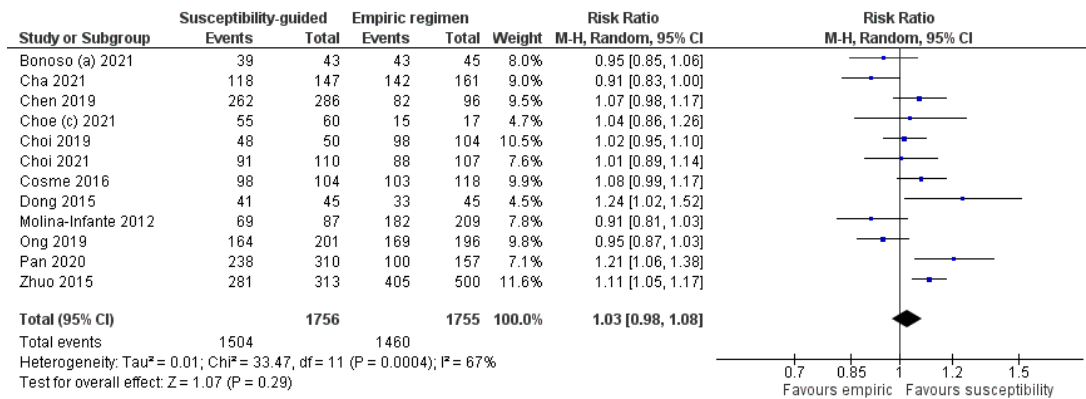

Supplement: gutjnl-2022-327745supp001_data_supplement.pdf [file gutjnl-2022-327745supp001_data_supplement.pdf]
